# Supplementary material for: Cu2+ modulated DNA-templated silver nanoclusters as a turn-on fluorescence probe for the detection of quinolones
Source: Royal Society of Chemistry journal article supplement (doi:10.1039/c8ay01497c), 2018-01-01
Supplement: c8ay01497c1.pdf [file c8ay01497c1.pdf]

## Electronic Supporting Information

### **Cu<sup>2+</sup> modulated DNA-templated silver nanoclusters as a turn-on fluorescence probe for the detection of quinolones**

Renjun Wang <sup>a†</sup>, Xiaolu Yan <sup>b†</sup>, Jing Sun <sup>c</sup>, Xiao Wang <sup>d</sup>, Xian-En Zhao <sup>b</sup>, Wei Liu <sup>d</sup>,  
Shuyun Zhu <sup>b\*</sup>

<sup>a</sup> College of Life Science, Qufu Normal University, Qufu City, Shandong Province, 273165, China.

<sup>b</sup> College of Chemistry and Chemical Engineering, Qufu Normal University, Qufu City, Shandong Province, 273165, China.

E-mail: shuyunzhu1981@163.com (S. Zhu).

<sup>c</sup> Qinghai Key Laboratory of Qinghai-Tibet Plateau Biological Resources, Northwest Institute of Plateau Biology, Chinese Academy of Sciences, Xining City, Qinghai Province, 810001, Qinghai, China

<sup>d</sup> Shandong Key Laboratory of TCM Quality Control Technology, Shandong Analysis and Test Center, Qilu University of Technology (Shandong Academy of Sciences), 19 Keyuan Street, Jinan 250014, China

† The authors contributed equally to this work.

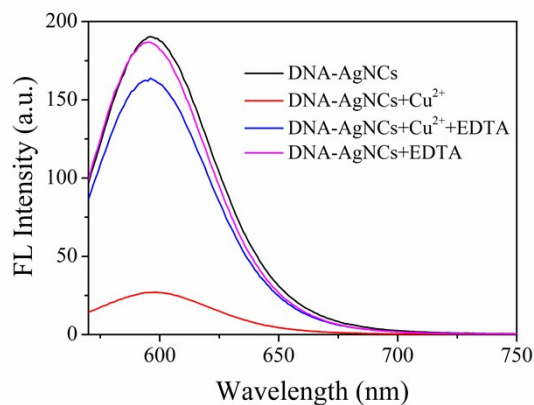

**Fig. S1** Fluorescence emission spectra of free DNA-AgNCs, and DNA-AgNCs in the presence of  $\text{Cu}^{2+}$ , EDTA, and both  $\text{Cu}^{2+}$  and EDTA. The final concentrations of  $\text{Cu}^{2+}$  and ciprofloxacin are 80 nM and 400 nM, respectively.

**Table S1** The linear equations, linear ranges, and LODs for the analysis of quinolones using DNA-AgNCs- $\text{Cu}^{2+}$  system.

| Quinolones     | Linear equation          | Linear range | LOD    |
|----------------|--------------------------|--------------|--------|
| nalidixic acid | $y = -1.5678 + 0.0831x$  | 20-100 nM    | 2.0 nM |
| cinoxacin      | $y = 0.00922 + 0.00394x$ | 5-120 nM     | 1.2 nM |
| ciprofloxacin  | $y = 0.5904 + 0.04684x$  | 5-100 nM     | 1.0 nM |
| moxifloxacin   | $y = 0.0162 + 0.10219x$  | 1-60 nM      | 96 pM  |

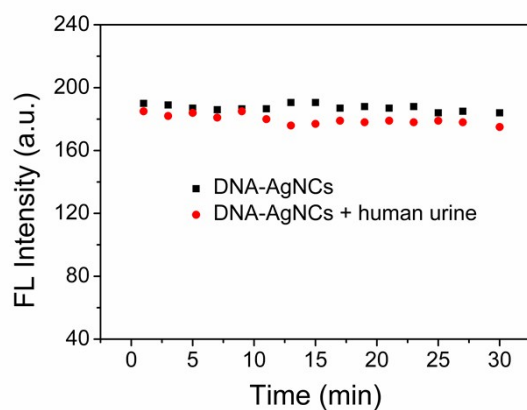

**Fig. S2** The stability test of DNA-AgNCs in the absence (black) and presence of human urine sample (1%) (red).

**Table S2** Determination of ciprofloxacin and moxifloxacin in tablets.

| Quinolones    | Amount (nM) | Added (nM) | Detected (nM) | Recovery (%) | RSD (%)<br>(n=3) |
|---------------|-------------|------------|---------------|--------------|------------------|
| ciprofloxacin | 10          | 5          | 14.6          | 92.0         | 3.12             |
|               | 10          | 10         | 19.3          | 93.0         | 2.78             |
|               | 10          | 50         | 63.5          | 107          | 2.45             |
| moxifloxacin  | 5           | 2          | 6.89          | 94.5         | 3.13             |
|               | 5           | 5          | 9.7           | 94.0         | 3.02             |
|               | 5           | 25         | 31.5          | 106.0        | 2.14             |

**Table S3** Determination of quinolones in human urine.

| Quinolones     | Added (nM) | Founded (nM) | Recovery (%) | RSD (n=3, %) |
|----------------|------------|--------------|--------------|--------------|
| nalidixic acid | 0          | N.D.         |              |              |
|                | 40         | 38.3         | 95.7         | 2.46         |
|                | 60         | 62.6         | 104.3        | 2.13         |
| cinoxacin      | 0          | N.D.         |              |              |
|                | 40         | 38.5         | 96.25        | 3.12         |
|                | 60         | 58.4         | 97.3         | 2.45         |
| ciprofloxacin  | 0          | N.D.         |              |              |
|                | 40         | 42.2         | 105.5        | 2.18         |
|                | 60         | 64.3         | 107.1        | 2.35         |
| moxifloxacin   | 0          | N.D.         |              |              |
|                | 20         | 18.9         | 94.5         | 1.89         |
|                | 40         | 43.1         | 107.7        | 2.44         |
